# Supplementary material for: Synthesis of silicone elastomers containing trifluoropropyl groups and their use in dielectric elastomer transducers
Source: Royal Society of Chemistry journal article supplement (doi:10.1039/c5ra16132k), 2015-01-01
Supplement: c5ra16132k1.pdf [file c5ra16132k1.pdf]

## Synthesis of silicone elastomers containing trifluoropropyl groups and their use in dielectric elastomer transducers

Mihaela Dascalu,<sup>a†</sup> Simon J. Dünki,<sup>a,b</sup> Jose-Enrico Q. Quinsaat,<sup>a,b</sup> Yee Song Ko,<sup>a,b</sup> Dorina M. Opris<sup>a\*</sup>

<sup>a</sup> Empa, Swiss Federal Laboratories for Materials Science and Technology, Laboratory for Functional Polymers, Ueberlandstr. 129, CH-8600, Dübendorf, Switzerland, E-mail: dorina.opris@empa.ch.

<sup>b</sup> Ecole Polytechnique Fédérale de Lausanne (EPFL), Institut des matériaux, Station 12, CH 1015, Lausanne, Switzerland.

<sup>†</sup> Present address: Petru Poni Institute of Macromolecular Chemistry, Aleea Grigore Ghica Voda 41A, Iasi, 700487, Romania

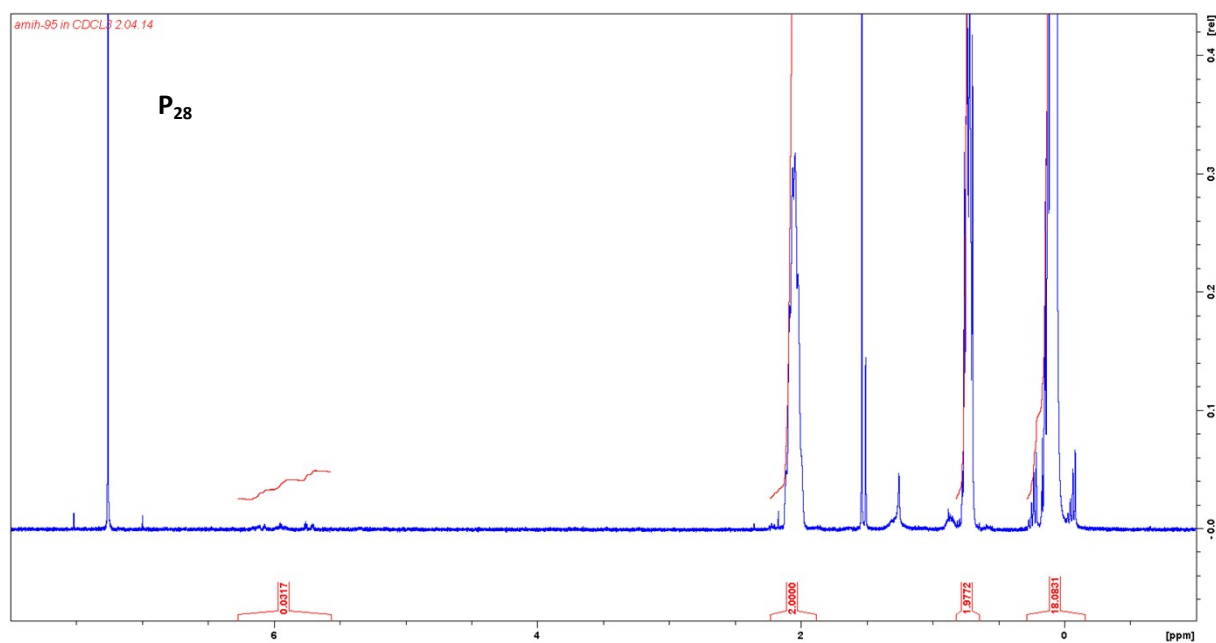

Fig. S1 <sup>1</sup>H NMR spectrum of P<sub>28</sub> in CDCl<sub>3</sub> at room temperature.

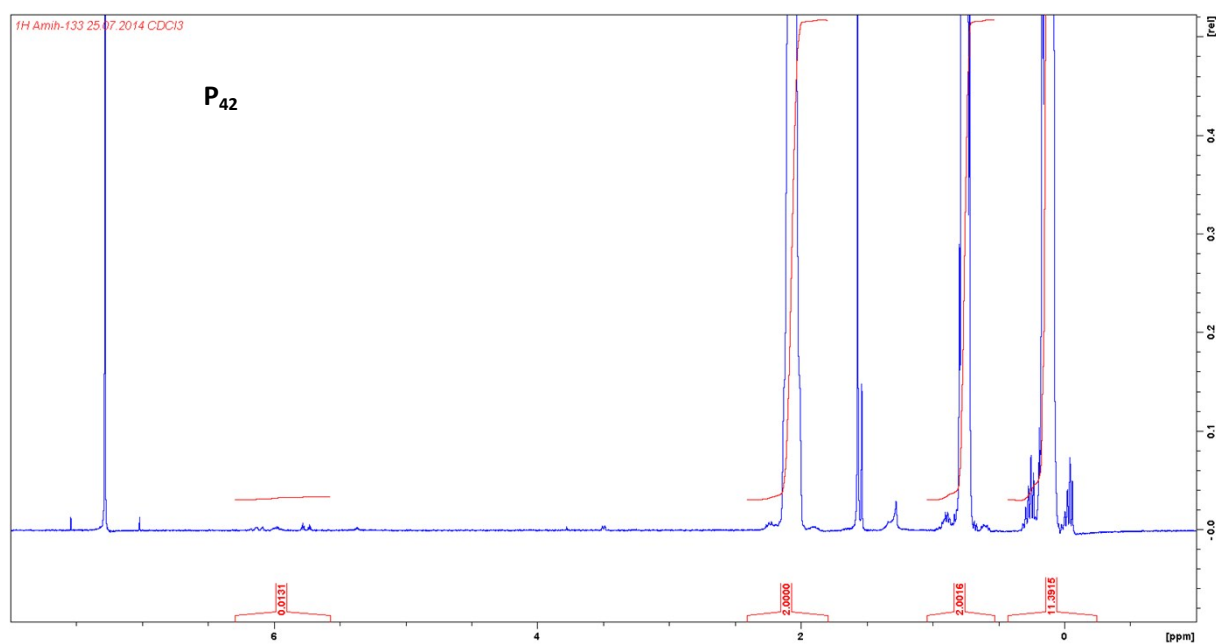

Fig. S2 <sup>1</sup>H NMR spectrum of P<sub>42</sub> in CDCl<sub>3</sub> at room temperature.

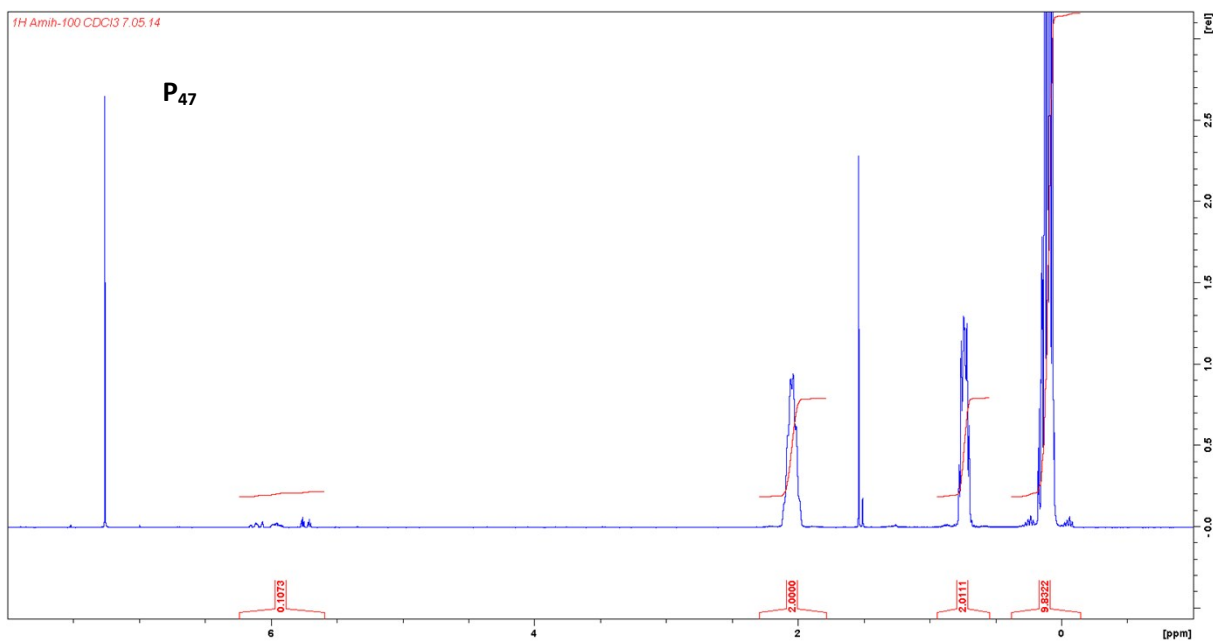

**Fig. S3** <sup>1</sup>H NMR spectrum of **P<sub>47</sub>** in CDCl<sub>3</sub> at room temperature.

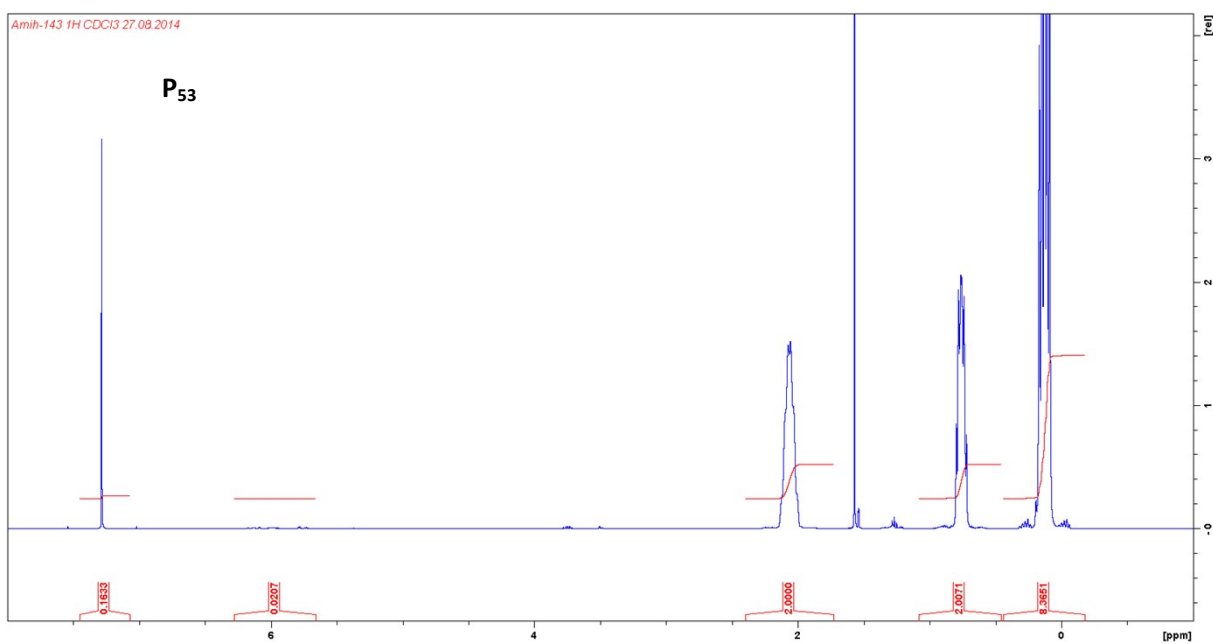

**Fig. S4** <sup>1</sup>H NMR spectrum of **P<sub>53</sub>** in CDCl<sub>3</sub> at room temperature.

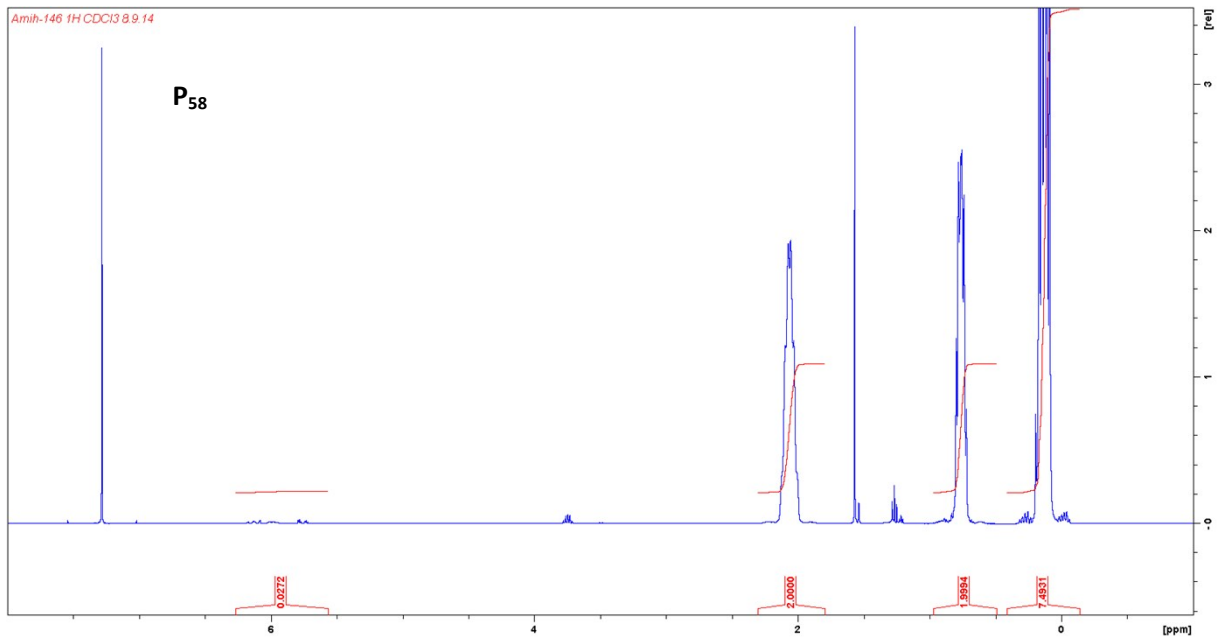

Fig. S5  $^1\text{H}$  NMR spectrum of  $\text{P}_{58}$  in  $\text{CDCl}_3$  at room temperature.

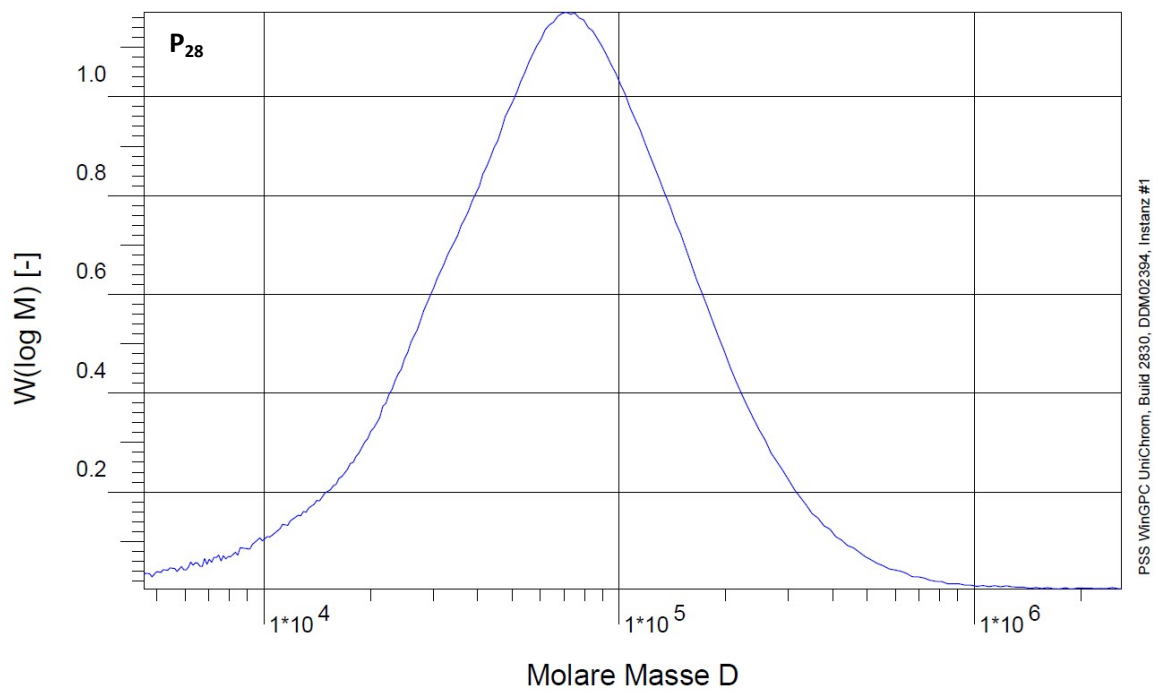

|                   |          |       |
|-------------------|----------|-------|
| $\overline{Mn}$ : | 4.6762e4 | g/mol |
| $\overline{Mw}$ : | 1.0172e5 | g/mol |
| $\overline{Mz}$ : | 2.5320e5 | g/mol |
| $\overline{Mv}$ : | 0.000000 | g/mol |
| $D$ :             | 2.1754e0 |       |

Fig. S6 GPC of  $\text{P}_{28}$  in THF.

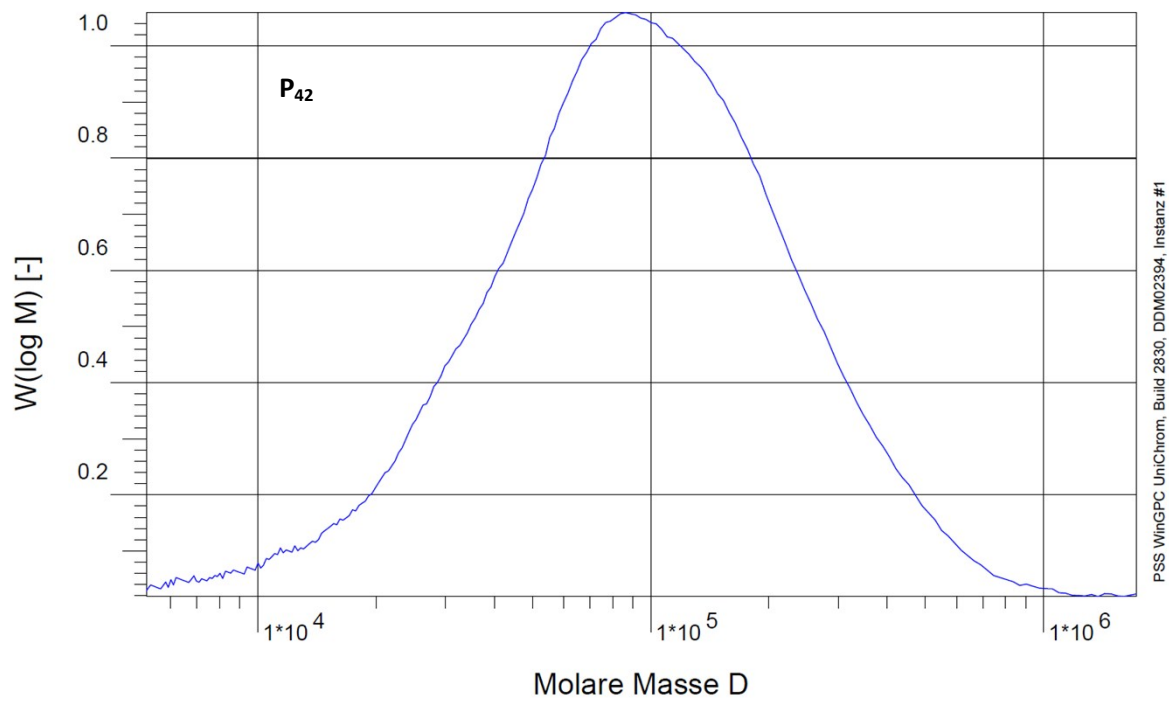

|                   |          |       |
|-------------------|----------|-------|
| $\overline{Mn}$ : | 5.9191e4 | g/mol |
| $\overline{Mw}$ : | 1.4017e5 | g/mol |
| $\overline{Mz}$ : | 3.1178e5 | g/mol |
| $\overline{Mv}$ : | 0.000000 | g/mol |
| <b>D</b> :        | 2.3681e0 |       |

**Fig. S7** GPC of **P<sub>42</sub>** in THF.

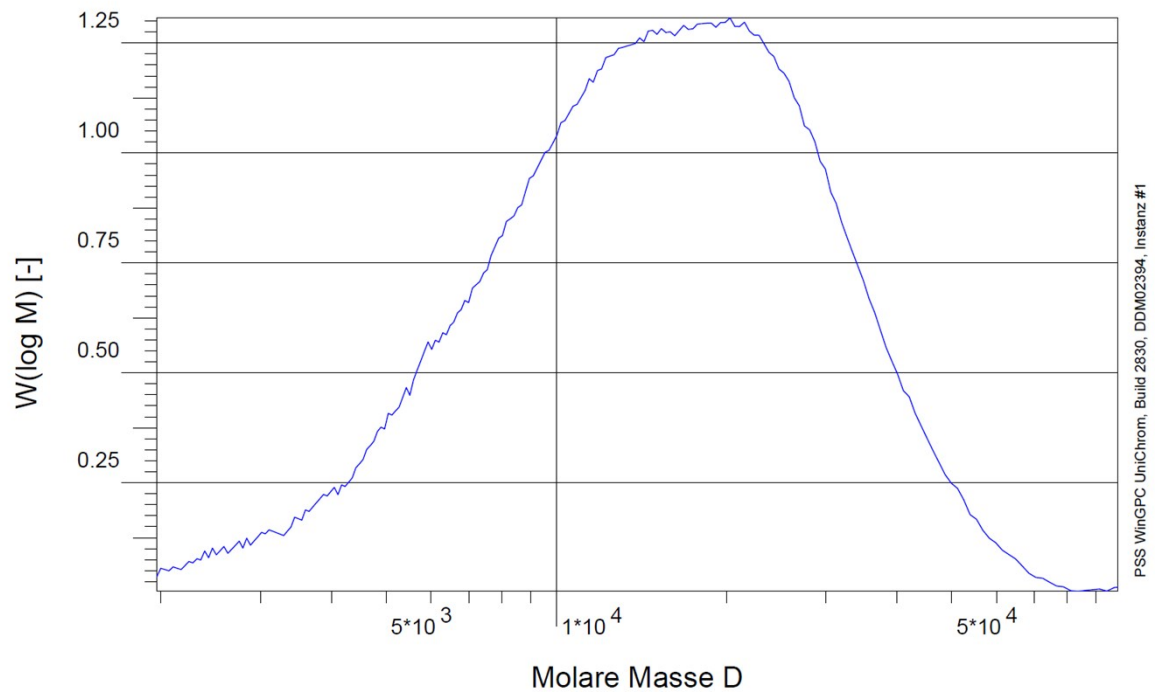

|                   |          |       |
|-------------------|----------|-------|
| $\overline{Mn}$ : | 1.1599e4 | g/mol |
| $\overline{Mw}$ : | 1.8191e4 | g/mol |
| $\overline{Mz}$ : | 2.5863e4 | g/mol |
| $\overline{Mv}$ : | 0.000000 | g/mol |
| $D$ :             | 1.5683e0 |       |

Fig. S8 GPC of P<sub>47</sub> in THF.

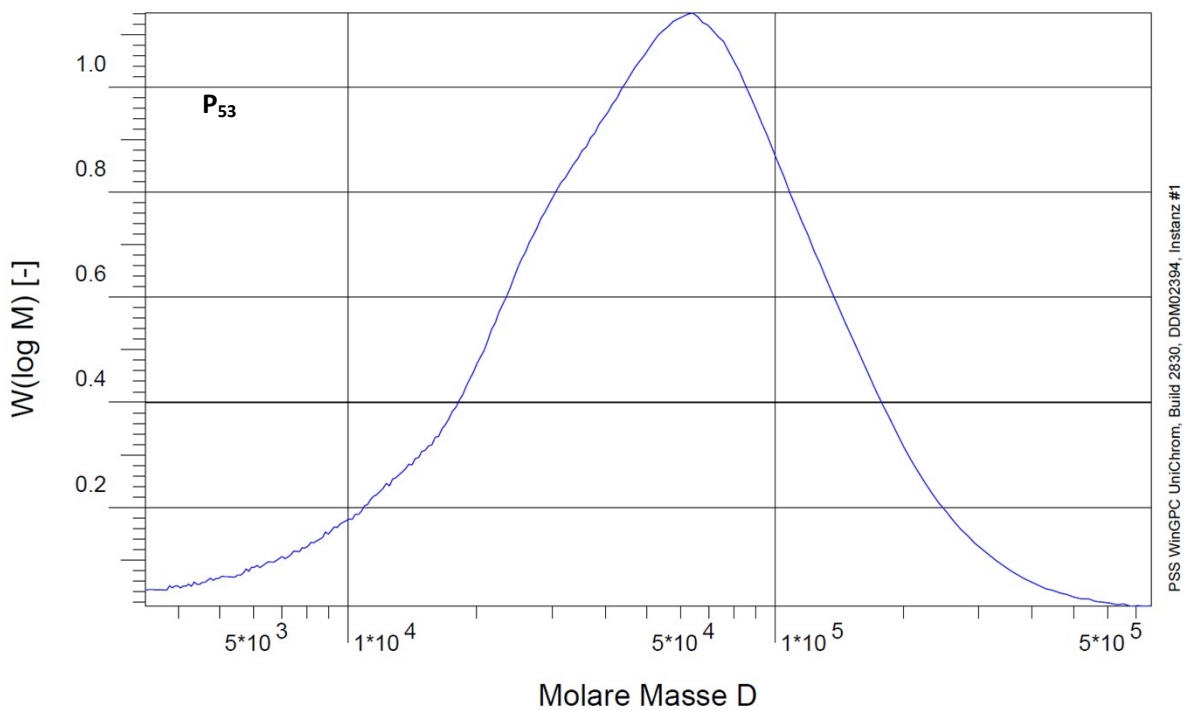

|                   |          |       |
|-------------------|----------|-------|
| $\overline{Mn}$ : | 3.4709e4 | g/mol |
| $\overline{Mw}$ : | 7.5884e4 | g/mol |
| $\overline{Mz}$ : | 1.4513e5 | g/mol |
| $\overline{Mv}$ : | 0.000000 | g/mol |
| <b>D</b> :        | 2.1863e0 |       |

**Fig. S9** GPC of **P<sub>53</sub>** in THF.

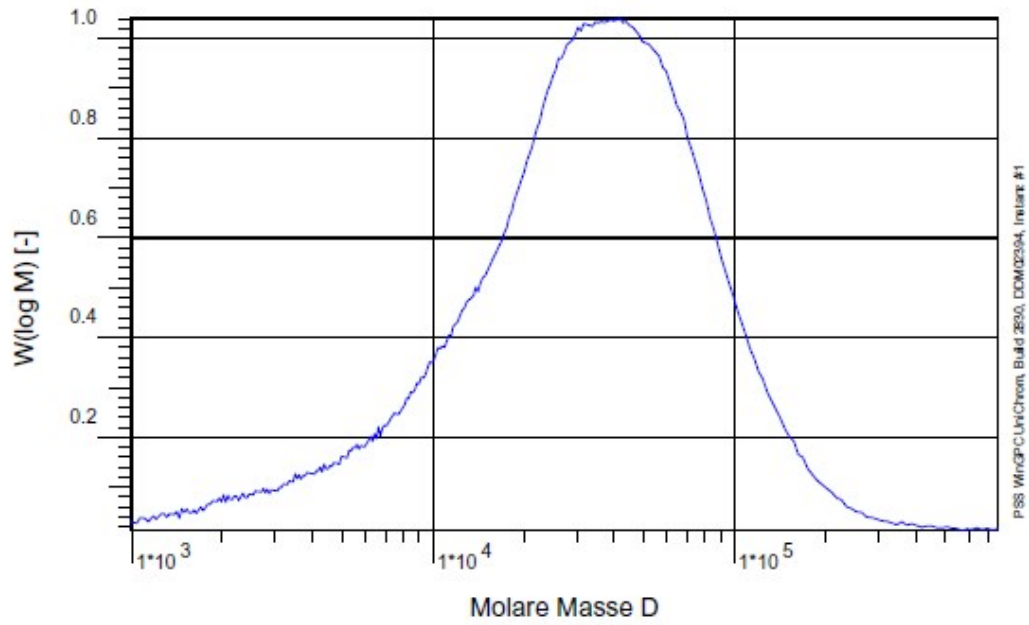

|             |          |       |
|-------------|----------|-------|
| <b>Mn</b> : | 1.6512e4 | g/mol |
| <b>Mw</b> : | 4.8871e4 | g/mol |
| <b>Mz</b> : | 1.1605e5 | g/mol |
| <b>Mv</b> : | 0.000000 | g/mol |
| <b>D</b> :  | 2.9597e0 |       |

Fig. S10 GPC of P<sub>58</sub> in THF.

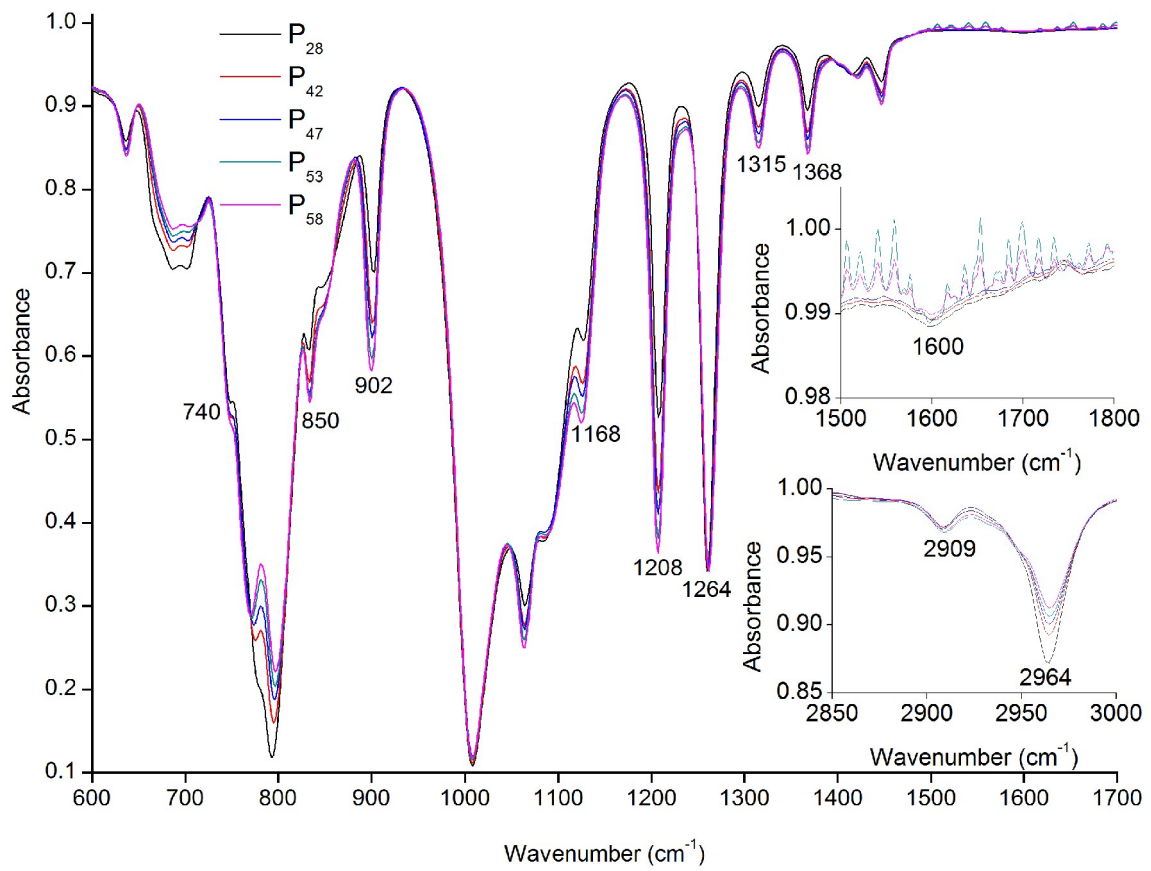

Fig. S11 FTIR spectra of P<sub>x</sub>.

Operator ID: fb  
 Sample ID: Amih-95  
 Sample Weight: 16.700 mg

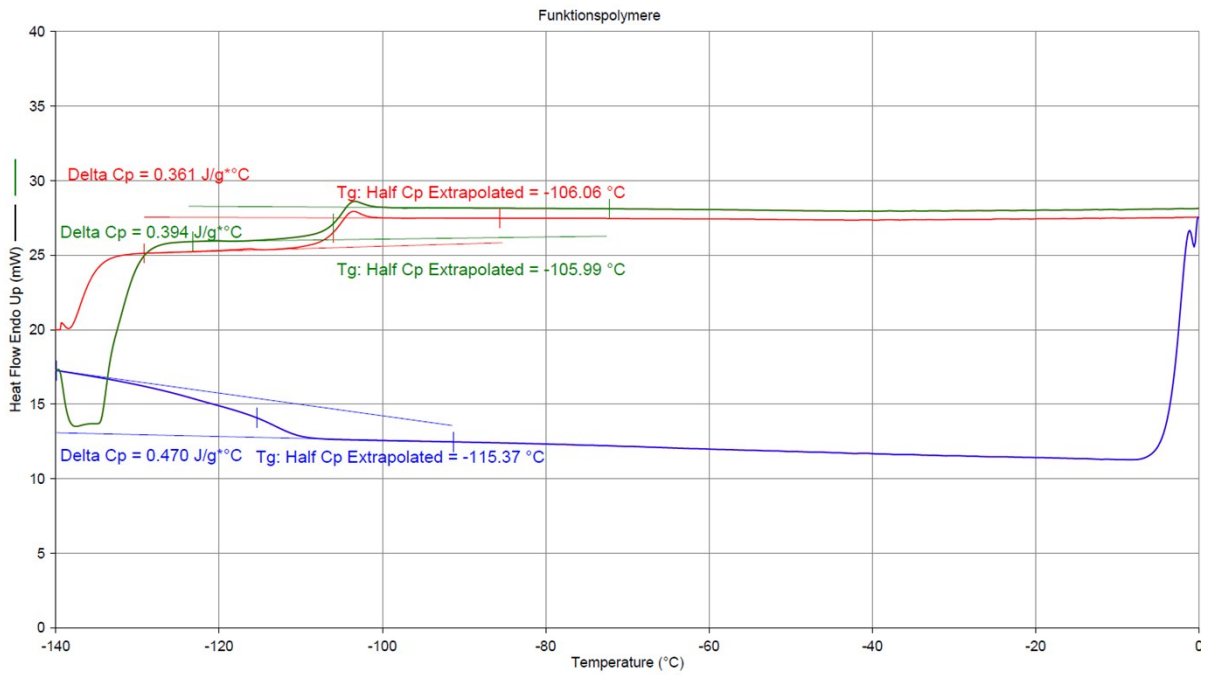

17.06.2014 14:28:11

1) Heat from -140.00°C to 0.00°C at 20.00°C/min  
 2) Cool from 0.00°C to -140.00°C at 20.00°C/min  
 3) Heat from -140.00°C to 0.00°C at 20.00°C/min

**Fig. S12** DSC curves of P<sub>28</sub>.

Operator ID: fb  
 Sample ID: Amih-133  
 Sample Weight: 10.800 mg

Amih-133: Amih-133-1+2.DSD  
 Heat Flow Endo Up (mW) : Steps: 1-4  
 Amih-133: Amih-133-1+2.DSD  
 Heat Flow Endo Up (mW) : Step: 2  
 Amih-133: Amih-133-1+2.DSD  
 Heat Flow Endo Up (mW) : Step: 4

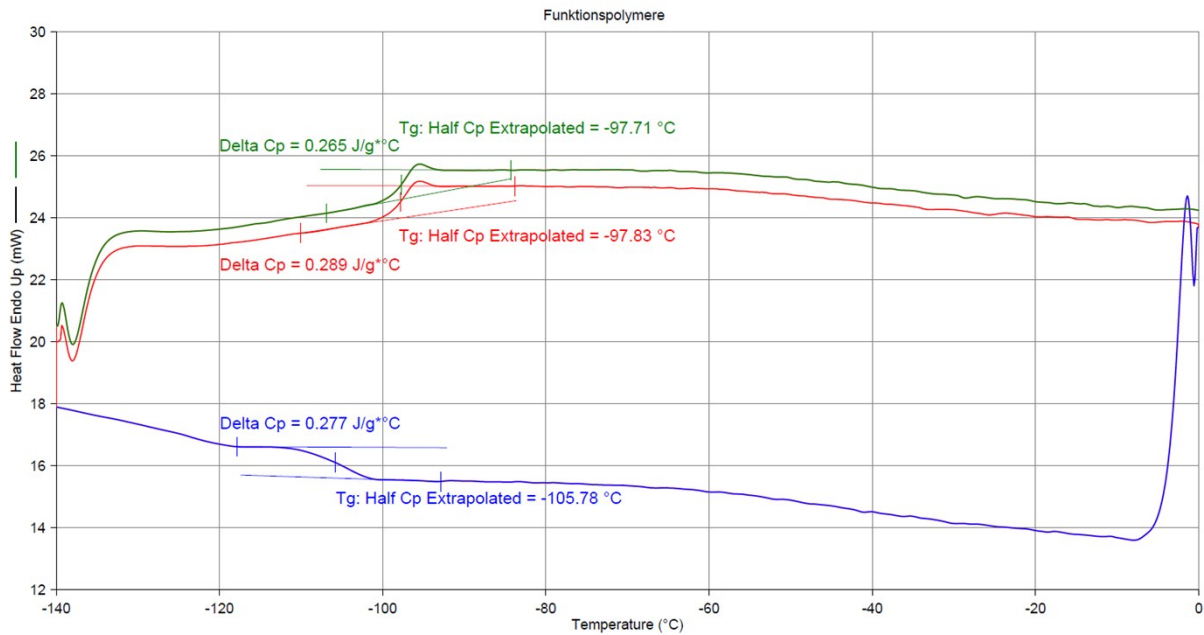

05.08.2014 13:11:28

1) Heat from -140.00°C to 0.00°C at 20.00°C/min  
 2) Cool from 0.00°C to -140.00°C at 20.00°C/min  
 3) Hold for 3.0 min at -140.00°C  
 4) Heat from -140.00°C to 0.00°C at 20.00°C/min

**Fig. S13** DSC curves of P<sub>42</sub>.



Operator ID: fb  
 Sample ID: Amih-100  
 Sample Weight: 15.400 mg

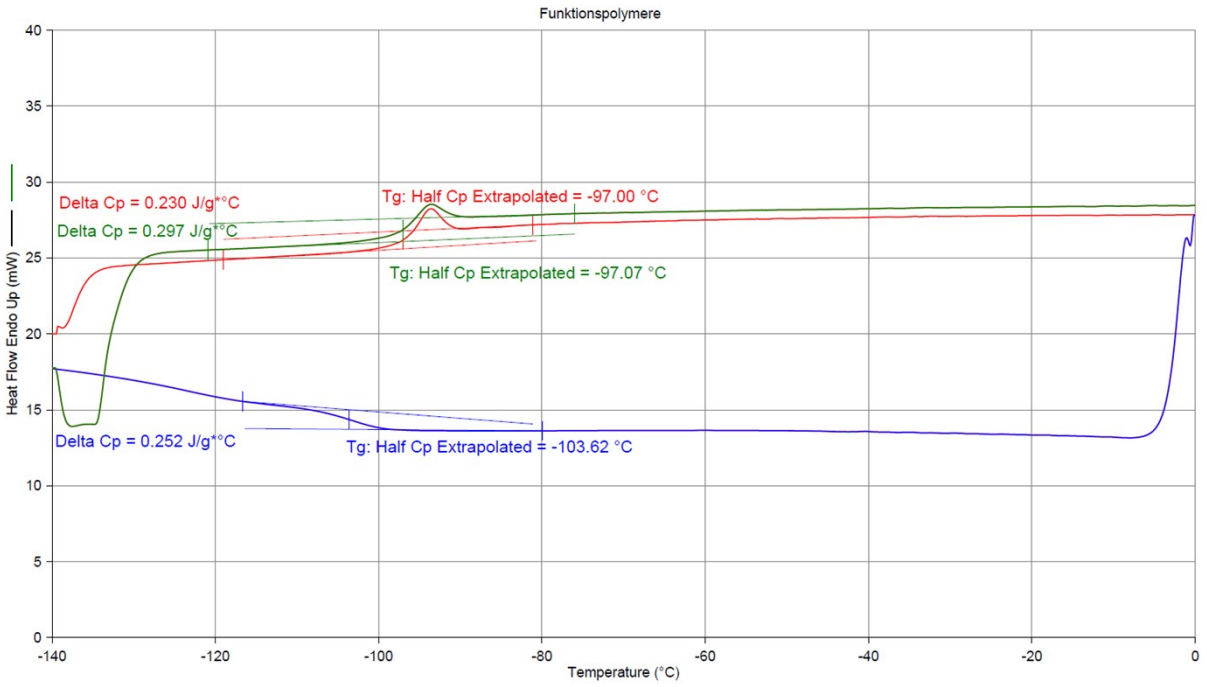

17.06.2014 14:52:51

1) Heat from -140.00°C to 0.00°C at 20.00°C/min  
 2) Cool from 0.00°C to -140.00°C at 20.00°C/min  
 3) Heat from -140.00°C to 0.00°C at 20.00°C/min

Fig. S14 DSC curves of P<sub>47</sub>.

Operator ID: fb  
 Sample ID: Amih-143  
 Sample Weight: 16.300 mg

Amih-143: Amih-143-1+2.DSD  
 Heat Flow Endo Up (mW) : Steps: 1-4  
 Amih-143: Amih-143-1+2.DSD  
 Heat Flow Endo Up (mW) : Step: 2  
 Amih-143: Amih-143-1+2.DSD  
 Heat Flow Endo Up (mW) : Step: 4

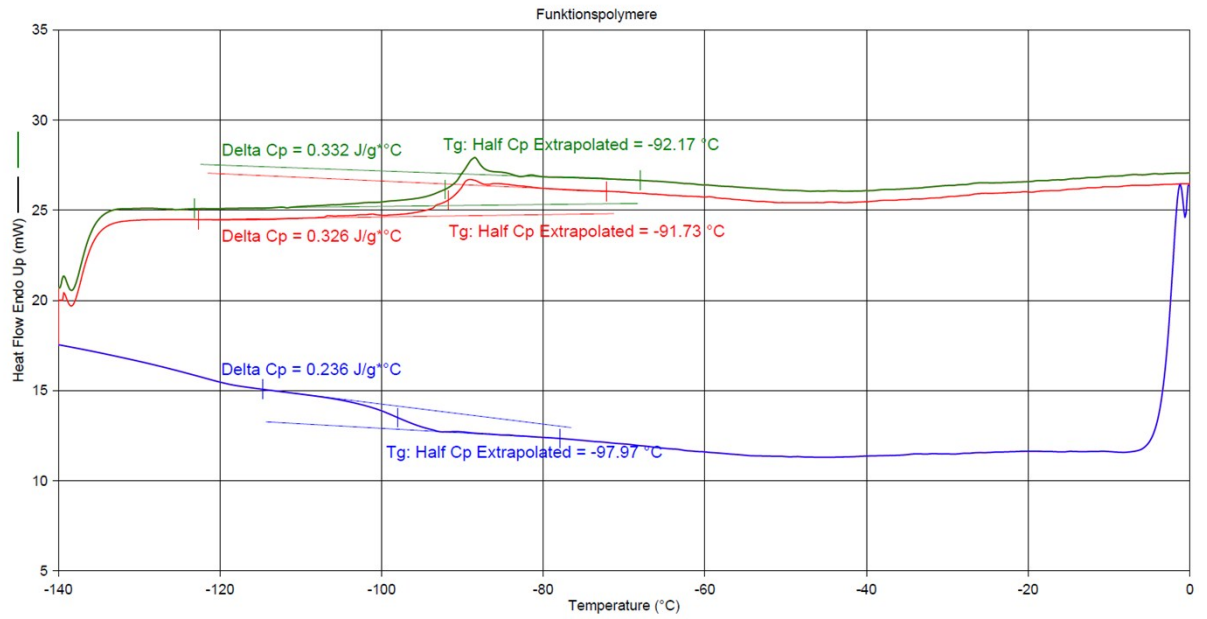

25.09.2014 08:10:36

1) Heat from -140.00°C to 0.00°C at 20.00°C/min  
 2) Cool from 0.00°C to -140.00°C at 20.00°C/min  
 3) Hold for 3.0 min at -140.00°C  
 4) Heat from -140.00°C to 0.00°C at 20.00°C/min

Fig. S15 DSC curves of P<sub>53</sub>.

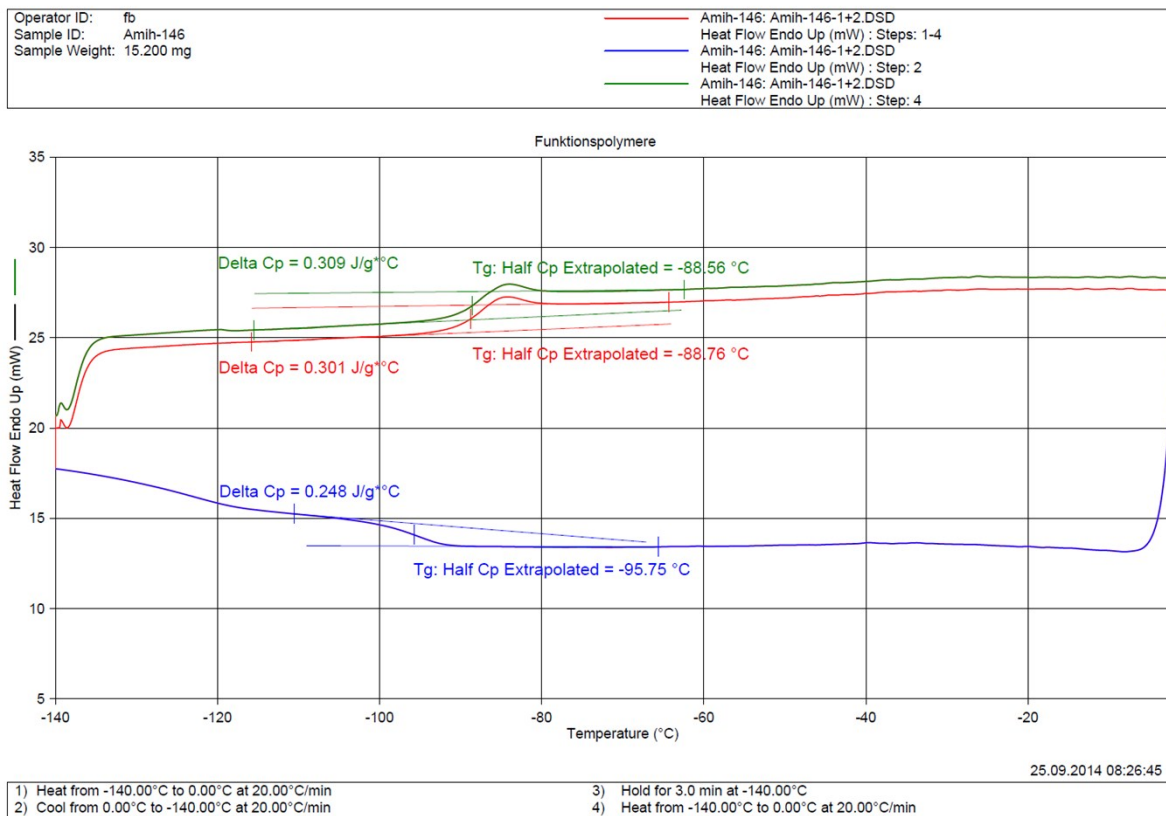

**Fig. S16** DSC curves of **P<sub>58</sub>**.

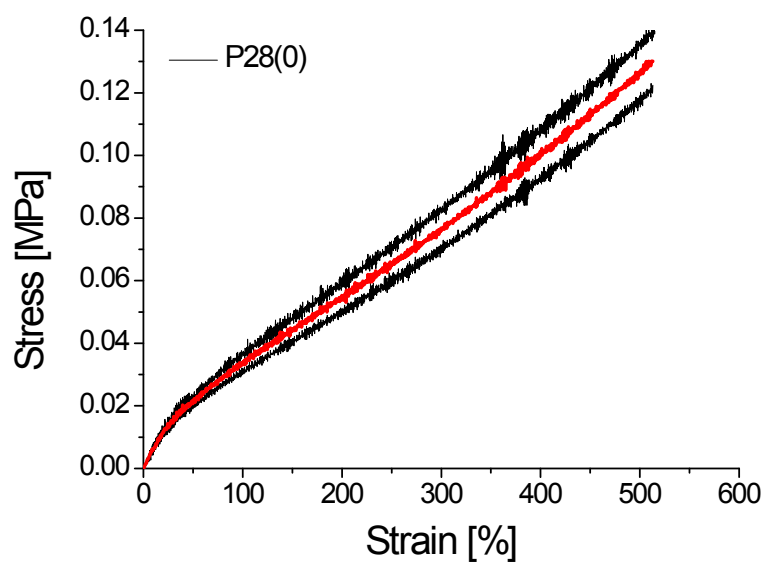

**Fig. S17** Stress-strain curves of material **P<sub>28(0)</sub>**. The red curve represents the average.

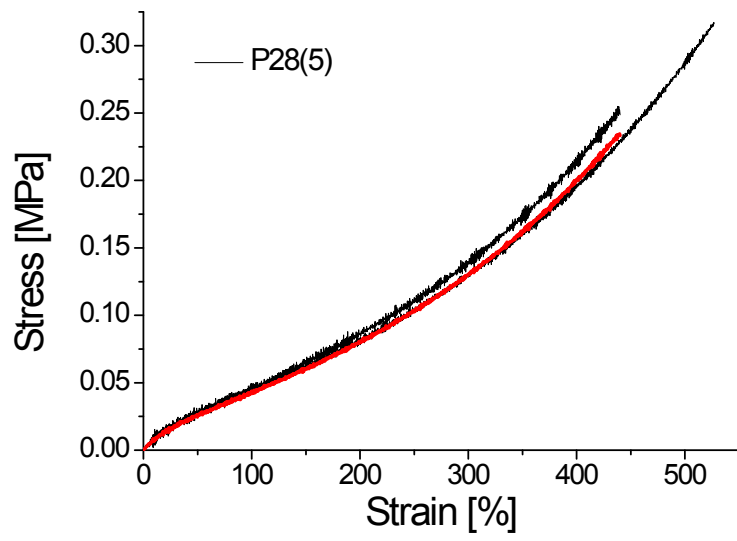

Fig. S18 Stress-strain curves of material  $P_{28}(5)$ . The red curve represents the average.

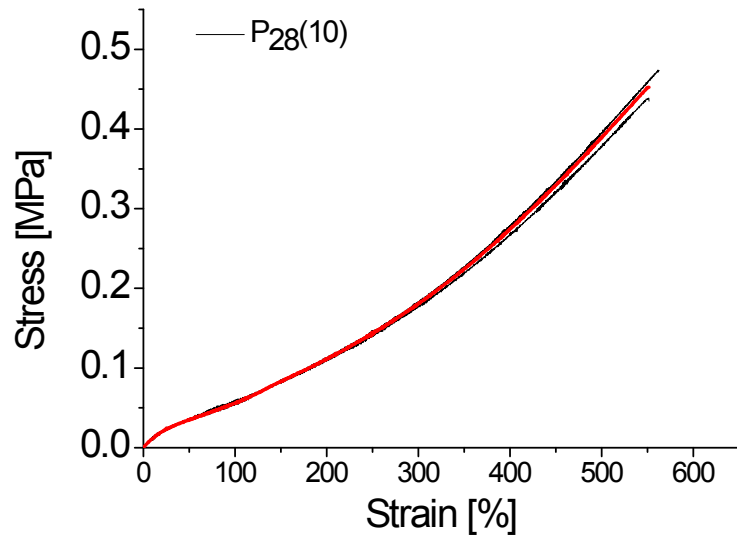

Fig. S19 Stress-strain curves of material  $P_{28}(10)$ . The red curve represents the average.

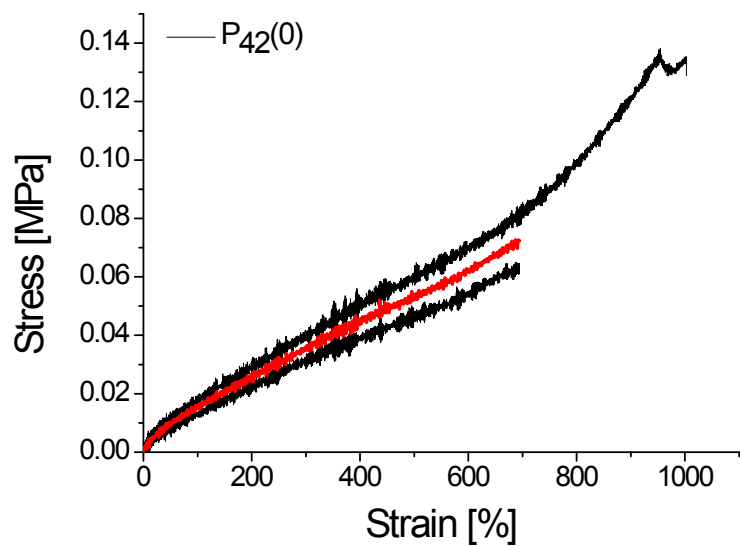

Fig. S20 Stress-strain curves of material P<sub>42</sub>(0). The red curve represents the average.

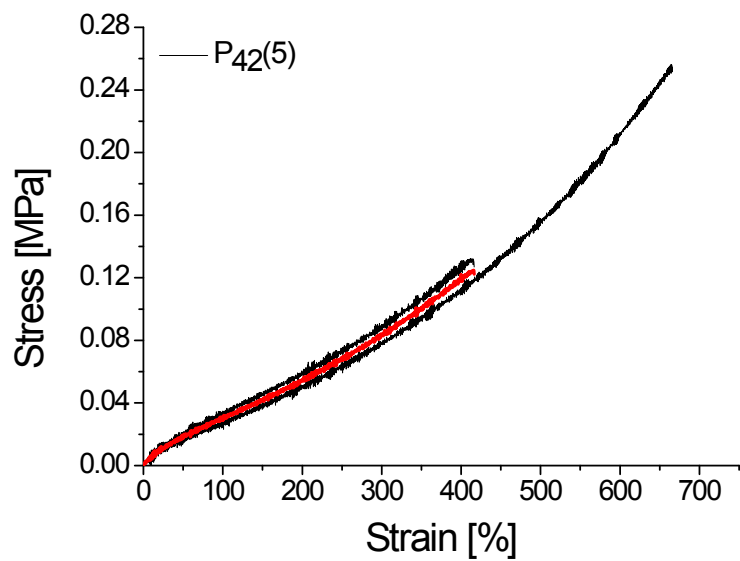

Fig. S21 Stress-strain curves of material P<sub>42</sub>(5). The red curve represents the average.

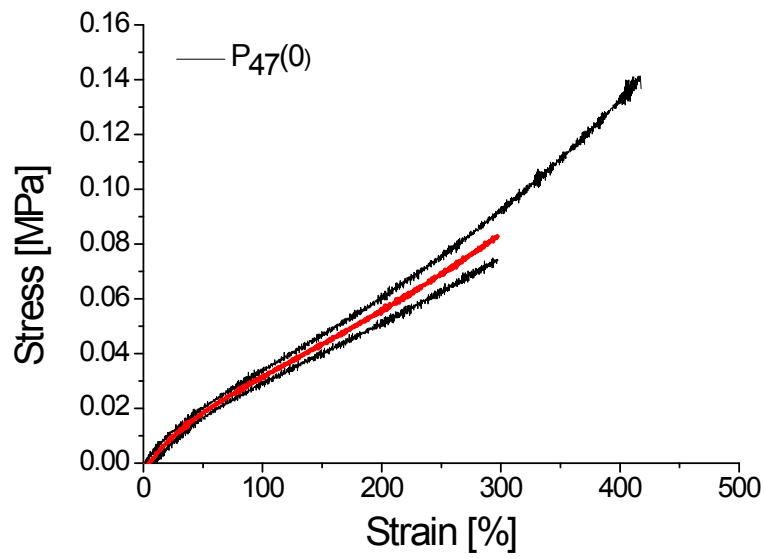

Fig. S22 Stress-strain curves of material P<sub>47</sub>(0). The red curve represents the average.

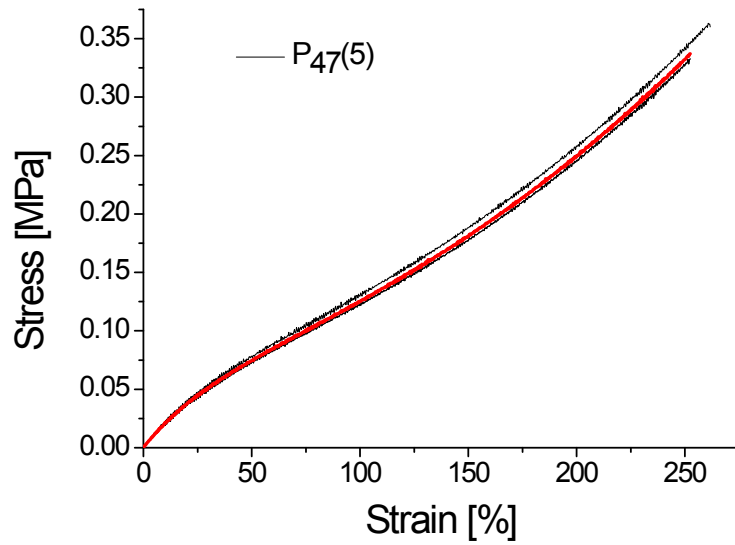

Fig. S23 Stress-strain curves of material P<sub>47</sub>(5). The red curve represents the average.

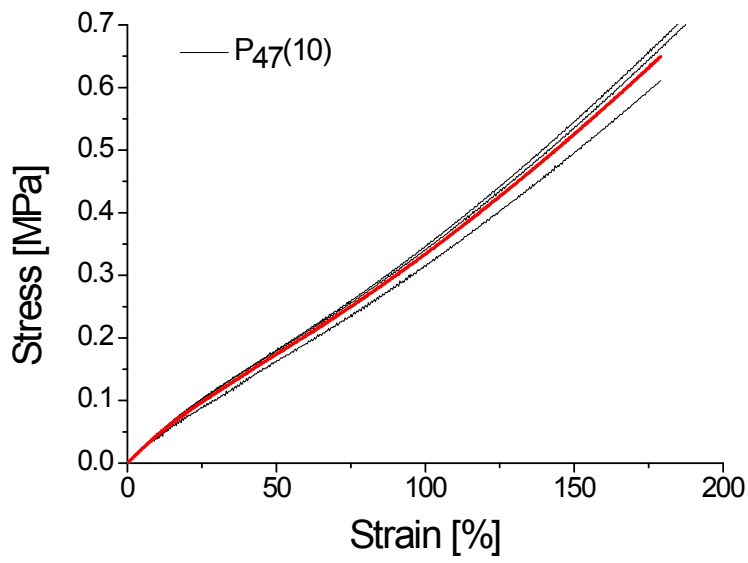

Fig. S24 Stress-strain curves of material P<sub>47</sub>(10). The red curve represents the average.

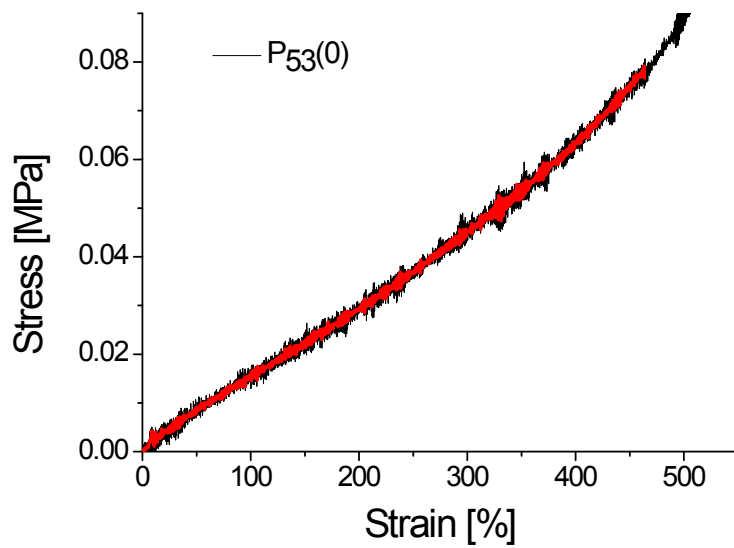

Fig. S25 Stress-strain curves of material P<sub>53</sub>(0). The red curve represents the average.

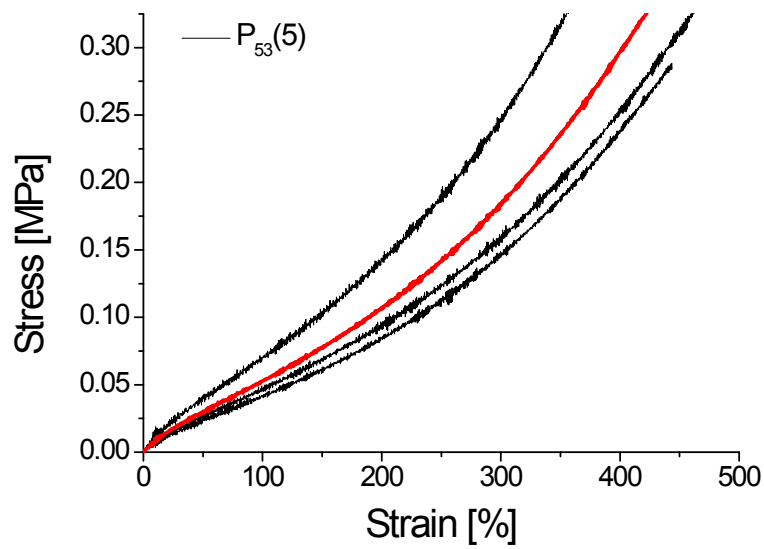

Fig. S26 Stress-strain curves of material  $P_{53}(5)$ . The red curve represents the average.

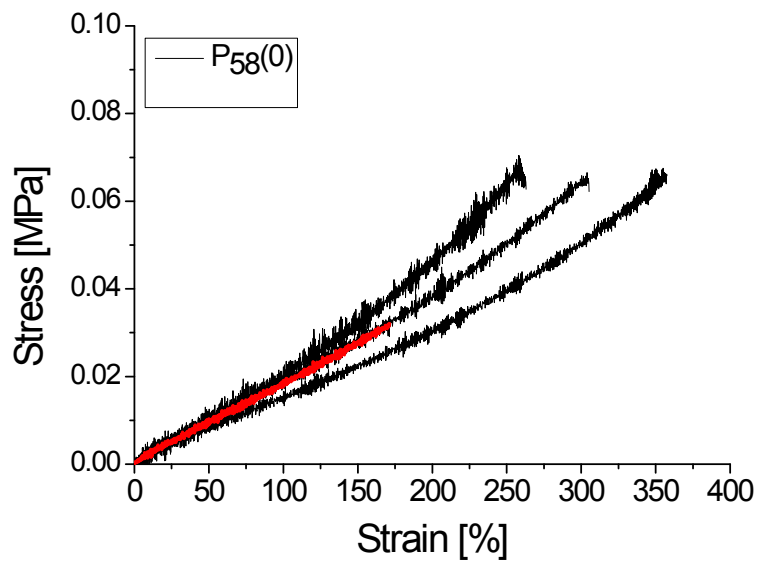

Fig. S27 Stress-strain curves of material  $P_{58}(0)$ . The red curve represents the average.

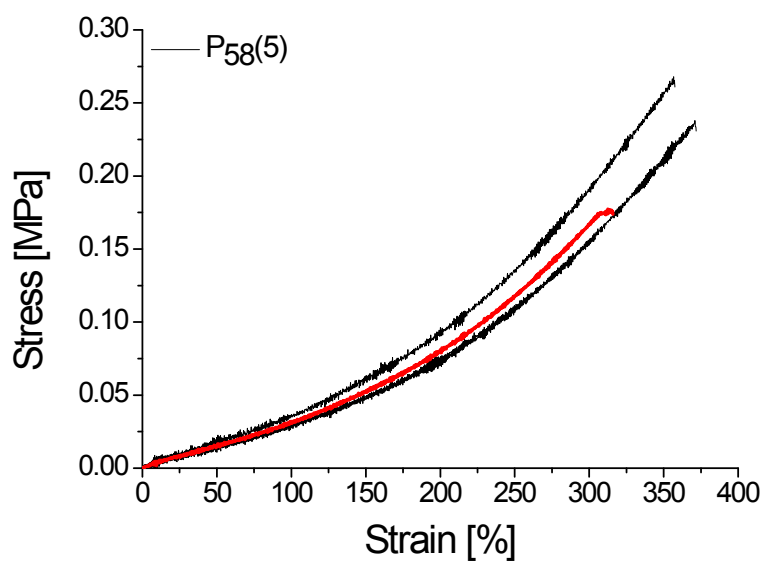

Fig. S28 Stress-strain curves of material  $P_{58}(5)$ . The red curve represents the average.

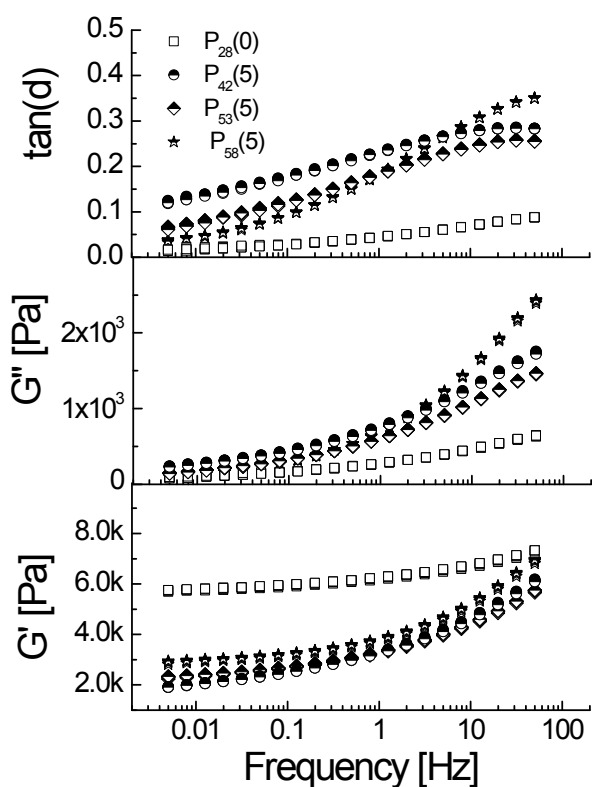

Fig. 29 Dependence of the real ( $G'$ ) and imaginary ( $G''$ ) parts of the shear modulus and the  $\tan(d)$  at room temperature for selected materials. The samples used had a thickness of  $263 \mu\text{m}$  -  $P_{58}(5)$ ,  $180 \mu\text{m}$  -  $P_{53}(5)$ ,  $187 \mu\text{m}$  -  $P_{42}(5)$ ,  $P_{28}(0)$  -  $250 \mu\text{m}$  and were measured one year after their synthesis.



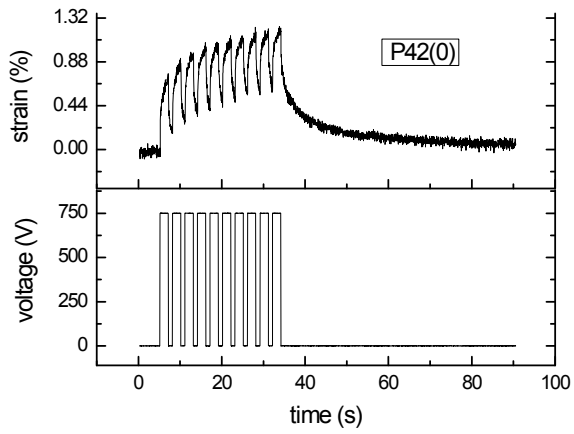

Fig. S30 Cyclic actuation tests of  $P_{42}(0)$  at  $4.3 \text{ V}/\mu\text{m}$  (10 cycles at 0.33 Hz).

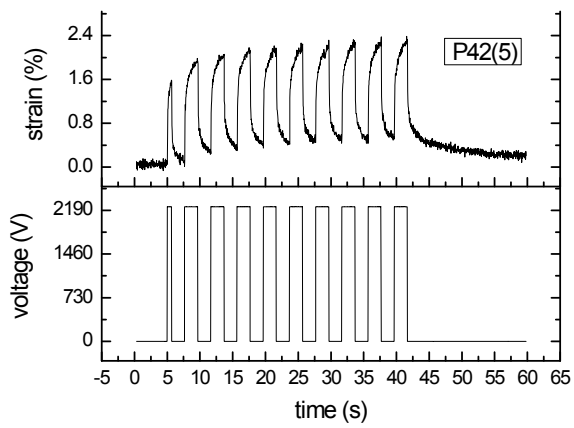

Fig. S31 Cyclic actuation strain of  $P_{42}(5)$  at  $7.1 \text{ V}/\mu\text{m}$  (10 cycles at 0.25 Hz).

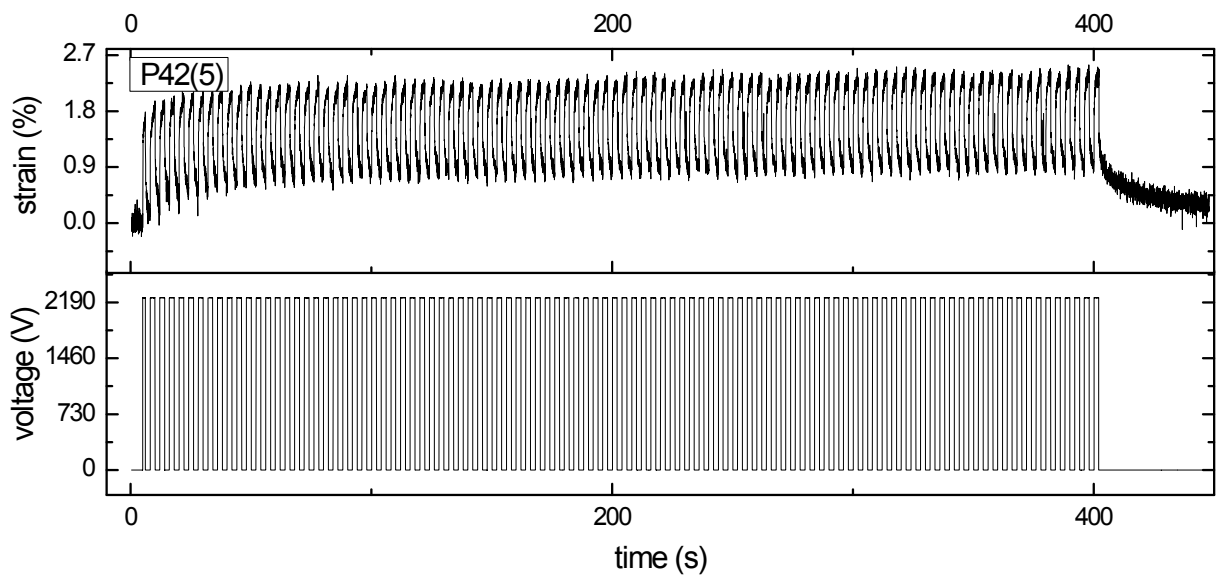

Fig. S32 Cyclic actuation strain of  $P_{42}(5)$  at  $7.1 \text{ V}/\mu\text{m}$  (100 cycles at 0.25 Hz).

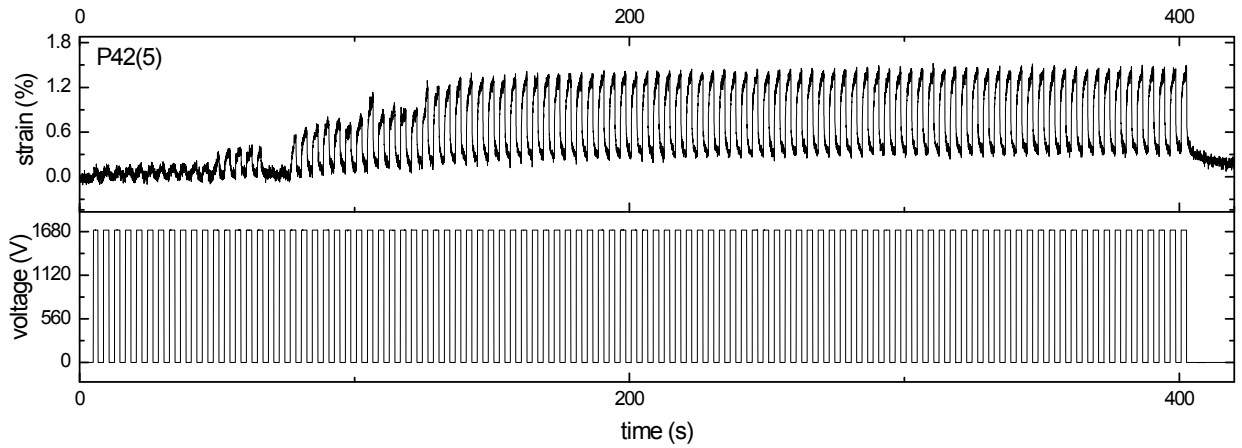

**Fig. S33** An actuator constructed from  $P_{42}(5)$  which suffered a shortcut and can self-repair after few cycles at  $5.5 \text{ V}/\mu\text{m}$  and  $0.25 \text{ Hz}$ .

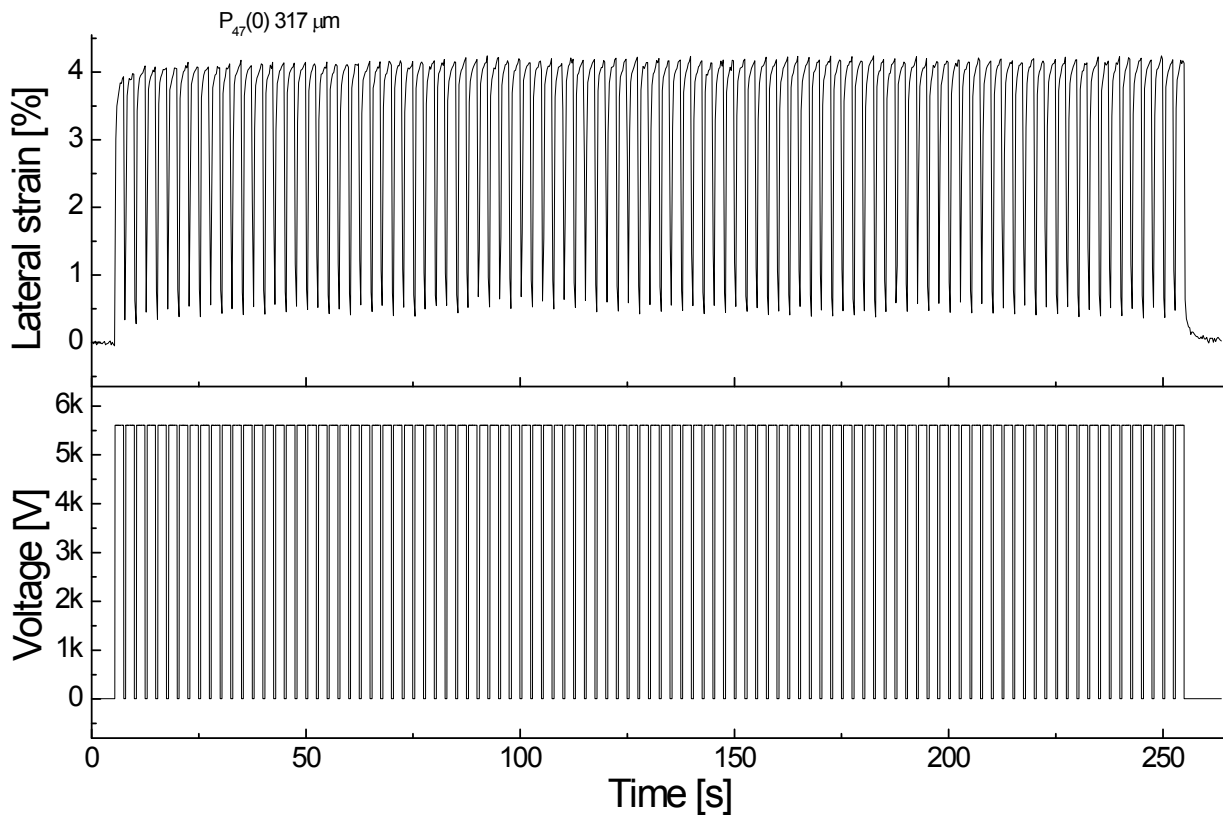

**Fig. S34** Cyclic actuation strain of  $P_{47}(0)$  at  $17.6 \text{ V}/\mu\text{m}$  (100 cycles at  $0.4 \text{ Hz}$ ).

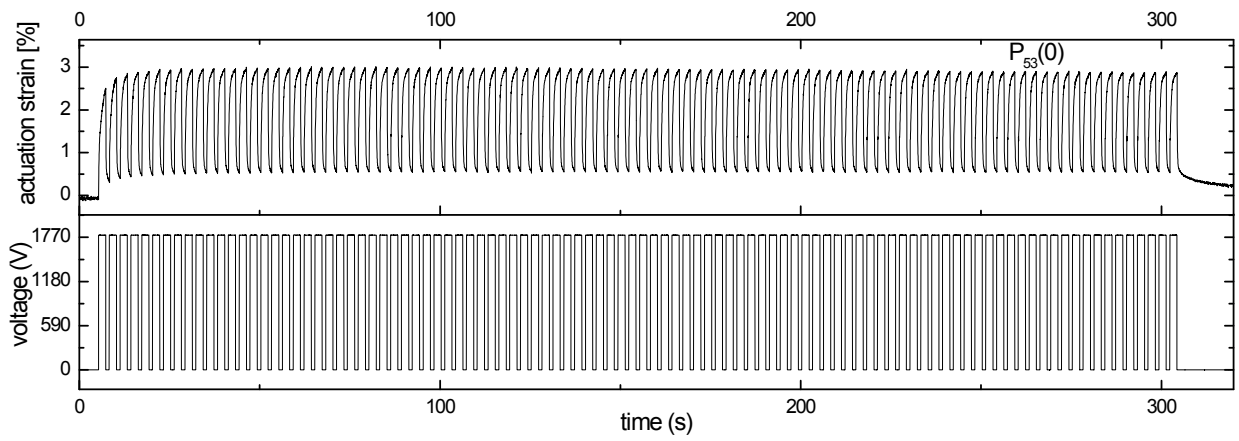

Fig. S35 Cyclic actuation strain of  $P_{53}(0)$  at  $5.6 \text{ V}/\mu\text{m}$  (100 cycles at 0.33 Hz).

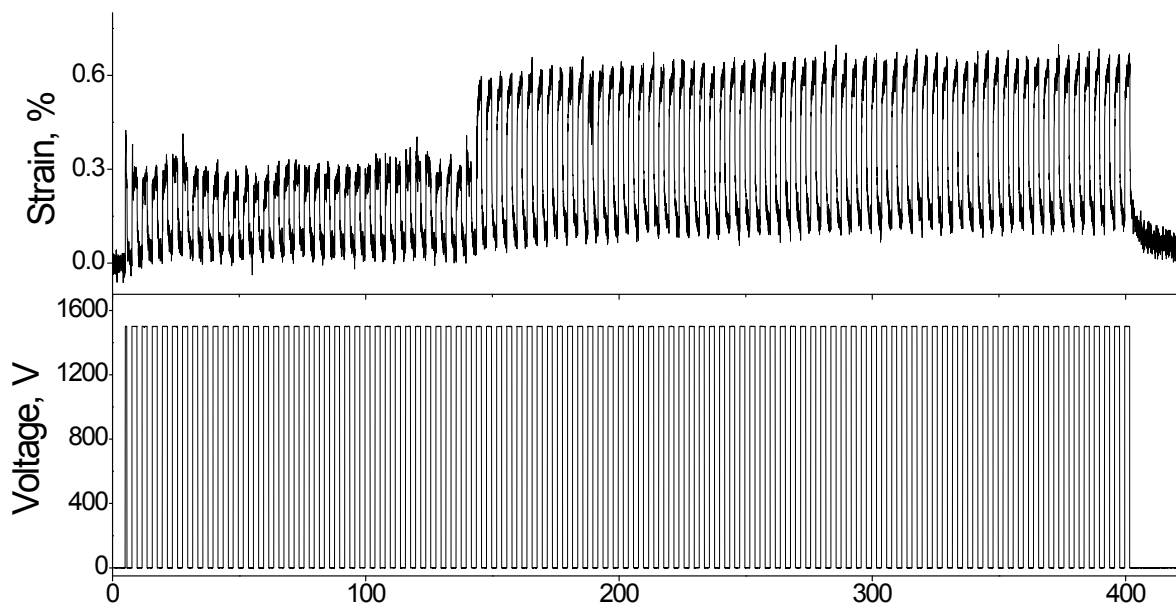

Fig. S36 Self-healing of an actuator constructed from  $P_{53}(5)$   $6.7 \text{ V}/\mu\text{m}$  at 0.25 Hz.

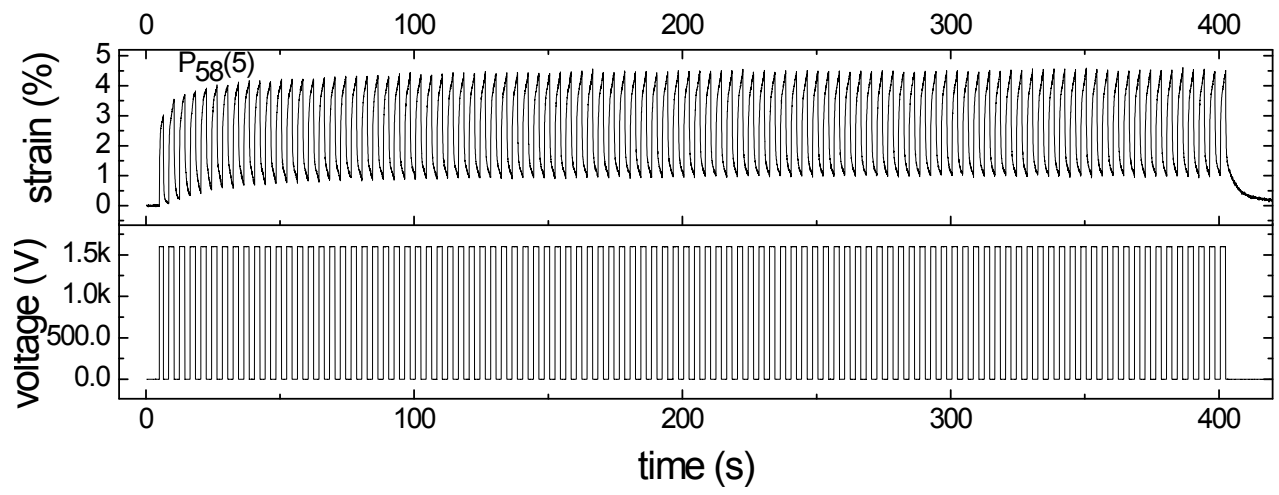

Fig. S37 Long-term stability of P<sub>58</sub>(5) at 10.2 V/ $\mu$ m for 100 cycles at 0.25 Hz.
